# Supplementary material for: On the morphological, structural and electrochemical properties of entangled Cu-filled carbon nano-onions
Source: Royal Society of Chemistry journal article supplement (doi:10.1039/c7ra12626c), 2018-01-01
Supplement: c7ra12626c1.pdf [file c7ra12626c1.pdf]

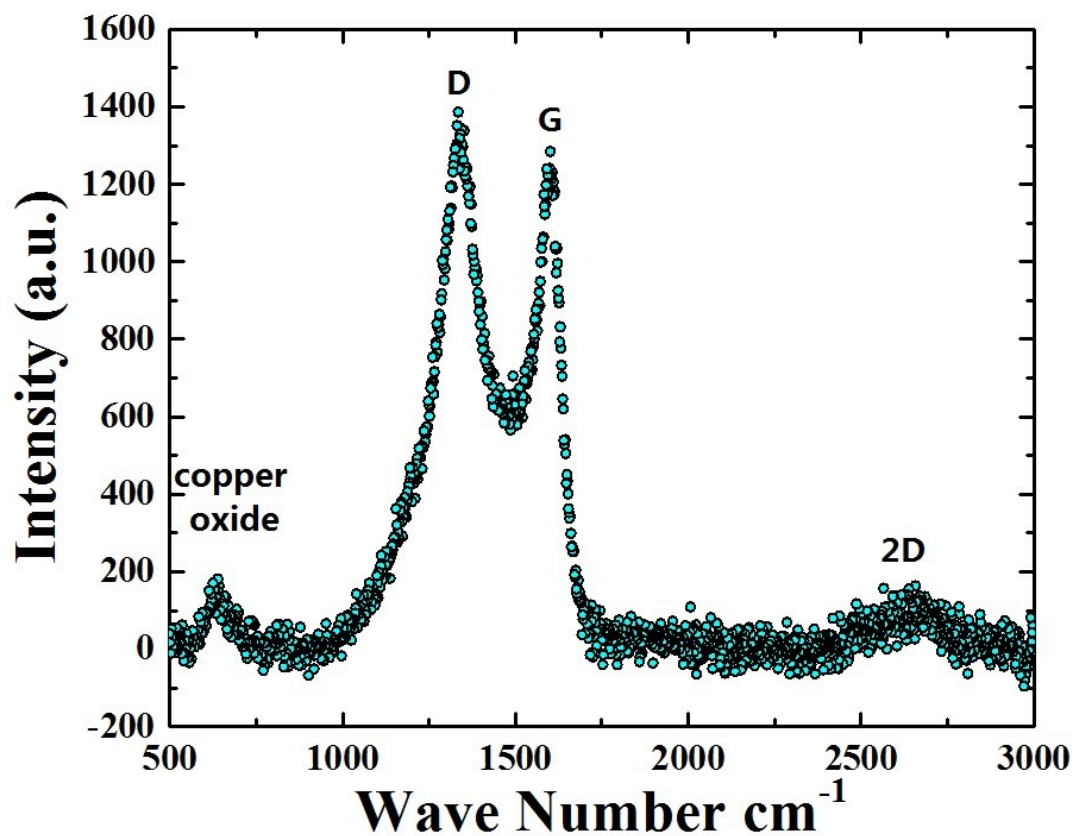

Figure Supp.1: Raman Spectrum of the Cu/Cu<sub>2</sub>O-filled CNOs showing the presence of a small peak ascribed to copper oxide and other peaks which could be ascribed to the D, G and 2D bands.

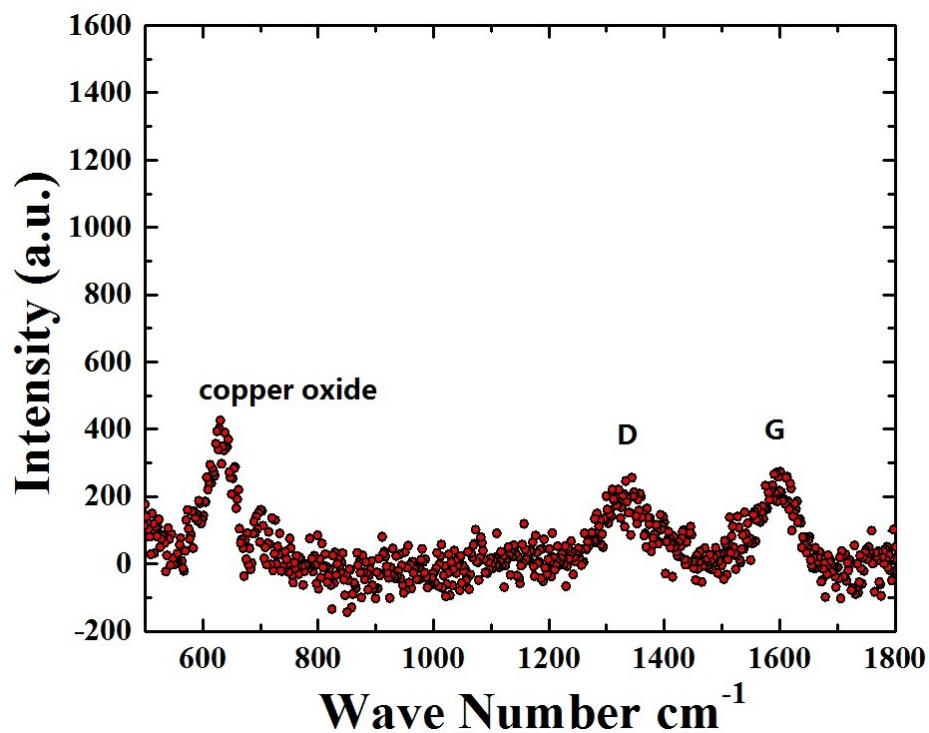

Figure Supp.2: Raman Spectrum of the region of the sample containing Cu<sub>2</sub>O-filled CNOs showing the presence of a small peak ascribed to copper oxide and other small peak-features which could be ascribed to the D and G bands.

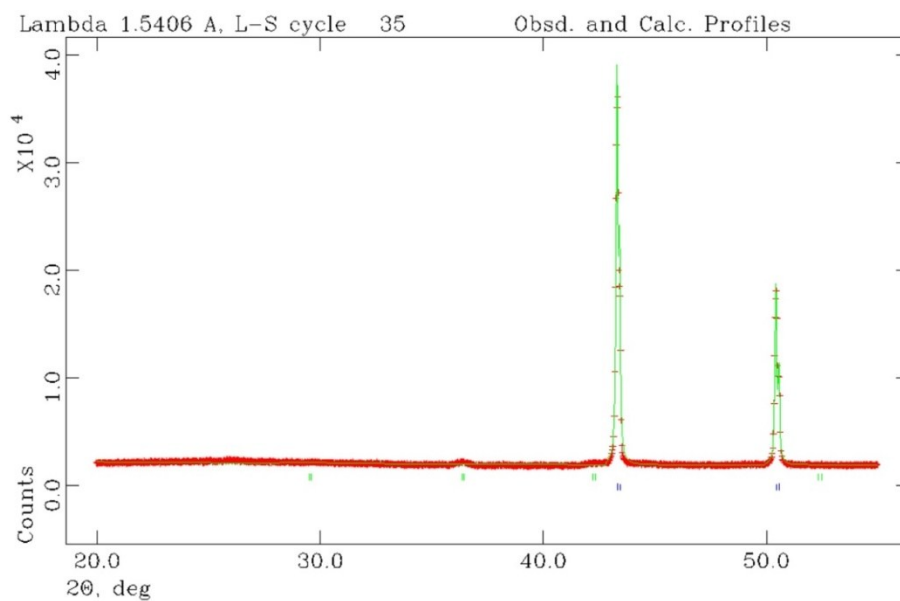

Figure Supp.3: Rietveld refinement of the diffractogram shown in the manuscript, Fig.10. By excluding the carbon contribution the ratio between Cu and Cu<sub>2</sub>O could be extracted as follows: Cu 94%, Cu<sub>2</sub>O 6%.

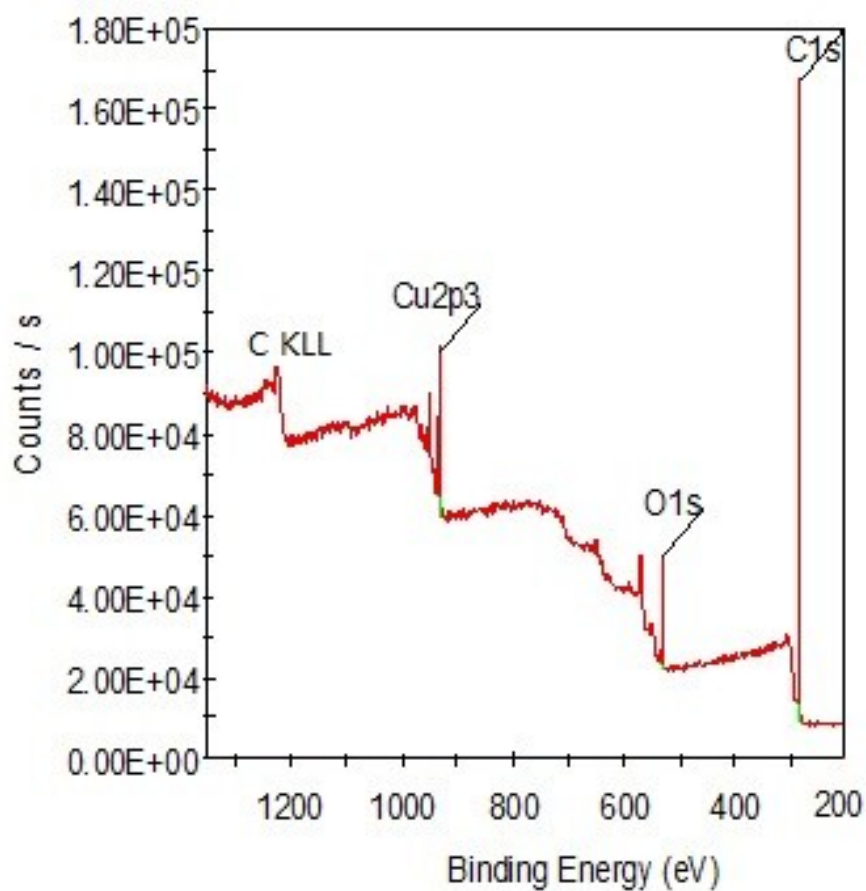

Figure Supp.4: XPS analyses of the Cu/Cu<sub>2</sub>O filled CNOs.
